# Supplementary material for: An Efficient Supervised Training Algorithm for Multilayer Spiking Neural Networks
Source: PLoS One. 2016 Apr 4;11(4):e0150329. doi: 10.1371/journal.pone.0150329 (PMC4820126; doi:10.1371/journal.pone.0150329)
Supplement: S2 Table — (XLSX) [file pone.0150329.s002.xlsx]

## Sheet: Sheet1
Training accuracy with different lengths of spike trains
Length of spike train (ms)	200	400	600	800	1000	1200	1400	1600	1800	2000	2200	2400	2600	2800
Accuracy of NSEBP	1	1	1	1	1	1	1	1	1	1	0.99	0.99	0.99	0.99
Accuracy of Multi-ReSuMe	1	1	1	1	1	1	1	1	1	0.99	0.99	0.99	0.99	0.98
Accuracy of Spikeprop	1	1	1	1	1	1	1	1	1	0.99	0.99	0.99	0.98	0.98
Training epochs with different lengths of spike trains
Length of spike train (ms)	200	400	600	800	1000	1200	1400	1600	1800	2000	2200	2400	2600	2800
Training epochs of NSEBP	3	3	4	4.2	4.5	4.8	5	5	5	5	6	6.5	7.2	7.8
Training epochs of Multi-ReSuMe	83	88	103	105	107	120	140	164	184	190	195	200	202	203
Training epochs of Spikeprop	46	75	79	80	81	85	86	89	90	91	90	95	100	105
Training time with different lengths of spike trains
Length of spike train (ms)	200	400	600	800	1000	1200	1400	1600	1800	2000	2200	2400	2600	2800
Training time of NSEBP (s)	0.14	0.21	0.36	0.46	0.61	0.75	0.89	0.94	1.03	1.11	1.48	1.61	2.01	2.13
Training time of Multi-ReSuMe (s)	15.2	50.4	110.3	132.5	238.1	310.8	528.7	571.2	587.1	683.4	722.2	810.7	860.4	875.3
Training time of Spikeprop (s)	12.1	24.4	50.3.5	100.2	110.5	186.4	221.1	320.3	468.6	521.7	614.8	627.9	723.4	783.1
